# Supplementary material for: Multi-mass velocity map imaging study of the 805 nm strong field ionization of CF3I
Source: Royal Society of Chemistry journal article supplement (doi:10.1039/d2cp02449g), 2022-01-01

**Electronic Supplementary Information to accompany:**

**Multi-mass velocity map imaging study of the 805 nm strong field ionization of CF<sub>3</sub>I.**

Stuart W Crane,<sup>a,#</sup> Jason W L Lee<sup>b,c</sup> and Michael N R Ashfold<sup>a</sup>

<sup>a</sup> School of Chemistry, University of Bristol, Bristol, U.K. BS8 1TS

<sup>b</sup> Department of Chemistry, University of Oxford, Oxford, U.K. OX1 3TA

<sup>c</sup> Deutsches Elektronen Synchrotron DESY, Hamburg, Germany

# Current address:

Department of Chemistry, Brown University, Providence, RI 02912, U.S.A.

**Table S1**

Enthalpies of formation for CF<sub>3</sub>I and various of its possible fragmentation products, from ref. 1.

| $\Delta_f H (0\text{ K}) / \text{kJ mol}^{-1}$ |        |  |                                |        |  |
|------------------------------------------------|--------|--|--------------------------------|--------|--|
| CF <sub>3</sub> I                              | -583.7 |  | CF <sub>3</sub> I <sup>+</sup> |        |  |
| CF <sub>3</sub>                                | -465.1 |  | CF <sub>3</sub> <sup>+</sup>   | 409.3  |  |
| <sup>1</sup> CF <sub>2</sub>                   | -193.9 |  | CF <sub>2</sub> <sup>+</sup>   | 908.1  |  |
| <sup>3</sup> CF <sub>2</sub>                   | 43.3   |  |                                |        |  |
| CF                                             | 243.2  |  | CF <sup>+</sup>                | 1122.9 |  |
| C                                              | 711.4  |  | C <sup>+</sup>                 | 1797.9 |  |
| F( <sup>2</sup> P <sub>3/2</sub> )             | 77.3   |  | F <sup>+</sup>                 | 1758.3 |  |
| F( <sup>2</sup> P <sub>1/2</sub> )             | 82.1   |  |                                |        |  |
| I( <sup>2</sup> P <sub>3/2</sub> )             | 107.2  |  | I <sup>+</sup>                 | 1115.6 |  |
| I( <sup>2</sup> P <sub>1/2</sub> )             | 198.1  |  |                                |        |  |

<sup>1</sup> B. Ruscic and D.H. Bross, Active Thermochemical Tables (ATcT) Values based on ver. 1.122r of the Thermochemical Network (2021); available at [Active Thermochemical Tables - Thermochemical Data \(anl.gov\)](https://atct.anl.gov/).

**Table S2**

Threshold energies for the processes:  $\text{CF}_3\text{I} \rightarrow \text{e}^- + \text{Y}$ , given  $D_0(\text{CF}_3\text{-I}) = 225.8 \text{ kJ mol}^{-1}$  (2.34 eV),<sup>1</sup> a value consistent with results of previous photofragment translational spectroscopy studies.<sup>2</sup>

| Y                                       | E / kJ mol <sup>-1</sup> | E / eV | Comment        |
|-----------------------------------------|--------------------------|--------|----------------|
| $\text{CF}_3\text{I}^+$                 | 1000.7                   | 10.37  |                |
| $\text{CF}_3^+ + \text{I}$              | 1099.2                   | 11.39  | <sup>3</sup>   |
| $\text{CF}_3 + \text{I}^+$              | 1234.2                   | 12.80  |                |
| $\text{CF}_2\text{I}^+ + \text{F}$      |                          | 13.4   | <sup>4</sup>   |
| $\text{CF}_2^+ + \text{F} + \text{I}$   | 1675.3                   | 17.36  |                |
| $\text{CF}^+ + 2\text{F} + \text{I}$    | 1968.4                   | 20.39  |                |
| $\text{CF}_3^+ + \text{I}^+$            | 2108.6                   | 21.84  |                |
| $\text{CF}_2^+ + \text{F} + \text{I}^+$ | 2684.7                   | 27.81  |                |
| $\text{CF}_2\text{I}^+ + \text{F}^+$    |                          | 30.8   |                |
| $\text{CF}_2^+ + \text{F}^+ + \text{I}$ | 3357.3                   | 34.78  |                |
|                                         |                          |        |                |
| $\text{CF}_3\text{I}^{2+}$              |                          | 28.0   | <sup>5</sup>   |
| $\text{CF}_3 + \text{I}^{2+}$           |                          | 31.94  | <sup>6</sup>   |
| $\text{CF}_3^{2+} + \text{I}$           |                          | ~38    | <sup>7</sup>   |
| $\text{CF}_3^{2+} + \text{I}^+$         |                          | ~48.5  | <sup>7</sup>   |
| $\text{CF}_3^{2+} + \text{I}^{2+}$      |                          | ~68    | <sup>6,7</sup> |
| $\text{CF}_3^{2+} + \text{I}^{3+}$      |                          | ~97    | <sup>6</sup>   |
| $\text{CF}_3^{2+} + \text{I}^{4+}$      |                          | ~137.5 | <sup>6,7</sup> |
|                                         |                          |        |                |
| $\text{C} + 3\text{F} + \text{I}$       | 1634.2                   | 16.93  | <sup>1</sup>   |
| $\text{C}^+ + 3\text{F}^+ + \text{I}^+$ | 8772.1                   | 90.87  | <sup>1</sup>   |

<sup>1</sup> B. Ruscic and D.H. Bross, Active Thermochemical Tables (ATcT) Values based on ver. 1.122r of the Thermochemical Network (2021); available at [Active Thermochemical Tables - Thermochemical Data \(anl.gov\)](https://active thermochemical tables - thermochemical data (anl.gov)).

<sup>2</sup> F. Aguirre and S.T. Pratt, *J. Chem. Phys.*, **118**, 1175 (2003).

<sup>3</sup> Consistent with observed threshold for this process reported in photoionization studies by R.L. Asher and B. Ruscic, *J. Chem. Phys.*, **106**, 210 (1997).

<sup>4</sup> Threshold value reported by I. Powis, O. Dutuit, M. Richard-Viard and P.M. Guyon, *J. Chem. Phys.*, **92**, 1643 (1990).

<sup>5</sup> Vertical excitation value, reported by J.H.D. Eland, R. Feifel and M. Hochlaf, *J. Chem. Phys.*, **128**, 234303 (2008).

<sup>6</sup> Using  $IE(\text{I} \rightarrow \text{I}^+) = 10.45 \text{ eV}$ ,  $IE(\text{I} \rightarrow \text{I}^{2+}) = 29.58 \text{ eV}$ ,  $IE(\text{I} \rightarrow \text{I}^{3+}) = 59.15 \text{ eV}$  and  $IE(\text{I} \rightarrow \text{I}^{4+}) = 99.5 \text{ eV}$ , from A. Kramida, Yu. Ralchenko, J. Reader, and NIST ASD Team (2018) *NIST Atomic Spectra Database* (ver. 5.9), (Online), Available: <https://physics.nist.gov/asd>, [2022, January 6], National Institute of Standards and Technology, Gaithersburg, NM. DOI: <https://doi.org/10.18434/T4W30F>.

<sup>7</sup> Using calculated value for adiabatic IP for  $\text{CF}_3^+ \rightarrow \text{CF}_3^{2+} = 26.8 \text{ eV}$  reported in J. Hrušák, N. Sändig and W. Koch, *Int. J. Mass Spectrom.*, **185**, 701-706 (1999) in reasonable agreement with value estimated experimentally (26.3 eV) in C.J. Proctor, C.J. Porter, T. Ast and J.H. Beynon, *Int. J. Mass Spectrom. Ion. Phys.*, **41**, 251-263 (1982).

**Table S3**

Summary of Z-dependent fragmentation channels for  $\text{CF}_3\text{I}^{Z+}$  ions identified in the present study.

| Z | Products                                                     | Process number |
|---|--------------------------------------------------------------|----------------|
| 1 | $\text{CF}_3^+ + \text{I}$                                   | (1)            |
|   | $\text{CF}_3 + \text{I}^+$                                   | (2)            |
|   | $\text{CF}_2\text{I}^+ + \text{F}$                           | (3)            |
| 2 | $\text{CF}_3^+ + \text{I}^+$                                 | (4)            |
|   | $\text{CF}_{3-n}^+ + \text{I}^+ + n\text{F}$ (n = 1-3)       | (4) + (5)      |
|   | $\text{CF}_2\text{I}^+ + \text{F}^+$                         | (6)            |
|   | $\text{CF}_2^+ + \text{IF}^+$                                | (7)            |
|   | $\text{CF}_2\text{I}^{2+} + \text{F}$                        | (8)            |
|   | $\text{CF}_3 + \text{I}^{2+}$                                | (9)            |
|   |                                                              |                |
| 3 | $\text{CF}_3^+ + \text{I}^{2+}$                              | (11)           |
|   | $\text{CF}_{3-n}^+ + \text{I}^{2+} + n\text{F}$ (n = 1-3)    | (11) + (5)     |
|   | $\text{CF}_3^{2+} + \text{I}^+$                              | (12)           |
|   | $\text{CF}_2\text{I}^{2+} + \text{F}^+$                      | (13)           |
| 4 | $\text{CF}_3^{2+} + \text{I}^{2+}$                           | (14)           |
|   | $\text{CF}_{3-n}^{2+} + \text{I}^{2+} + n\text{F}$ (n = 1-3) | (14) + (5)     |
|   | $\text{CF}^+ + \text{I}^{3+}$                                | (17)           |
| 5 | $\text{CF}_3^{2+} + \text{I}^{3+}$                           | (18)           |
|   | $\{\text{CF}_3^{3+}\} + \text{I}^{2+}$                       | (19) *         |
|   |                                                              |                |

\* { } signifies expectation that the 4-atom  $\text{CF}_3^{3+}$  species will have a very fleeting nature.

**Figure S1**

Comparisons of the  $P(v)$  distributions of the  $I^+$  and  $CF_3^+$  fragment ions measured following SFI of  $CF_3I$  with  $\lambda = 805$  nm photons at  $I = 650$  TW  $cm^{-2}$  derived from the symmetrized 3-time bin images shown in fig. 2 and 4 (green), from the similarly symmetrized 1- (*i.e.* centre time bin only, red) and 7-time bin, blue) images, and from the central slice (violet) obtained by Abel inverting the symmetrized crushed 7-time bin images. For consistency, both sliced images were obtained by integrating over the range  $5 \leq \theta \leq 175^\circ$ , to avoid the center-line noise.

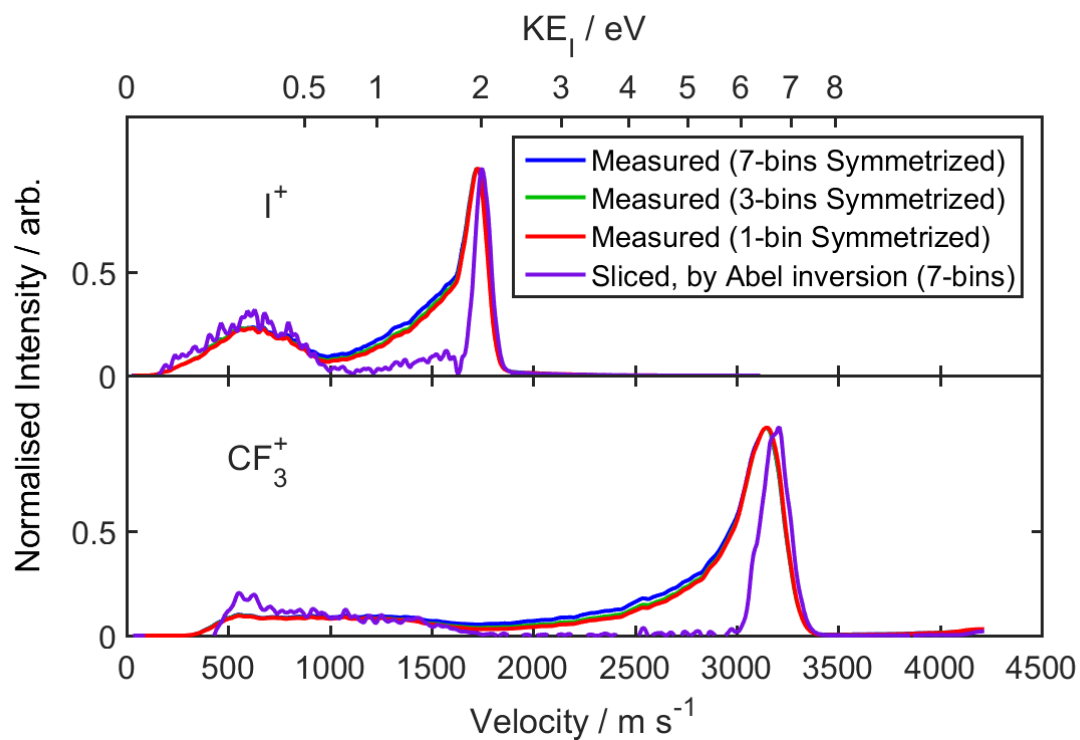

**Figure S2**

Symmetrized images of the (a)  $F^+$  and (b)  $F^{2+}$  fragments observed following SFI of  $CF_3I$  with  $\lambda = 805$  nm photons at  $I = 1300, 650$  and  $260$   $TW\ cm^{-2}$ , with the orientation of the  $\epsilon$  vector of the SFI laser radiation shown by the double headed red arrow in the top left panel. The corresponding  $P(v)$  distributions are shown in (c) with, in each case, the feature of greatest interest normalised to unit intensity. The corresponding  $KE_F$  scale is shown on the top x-axis.

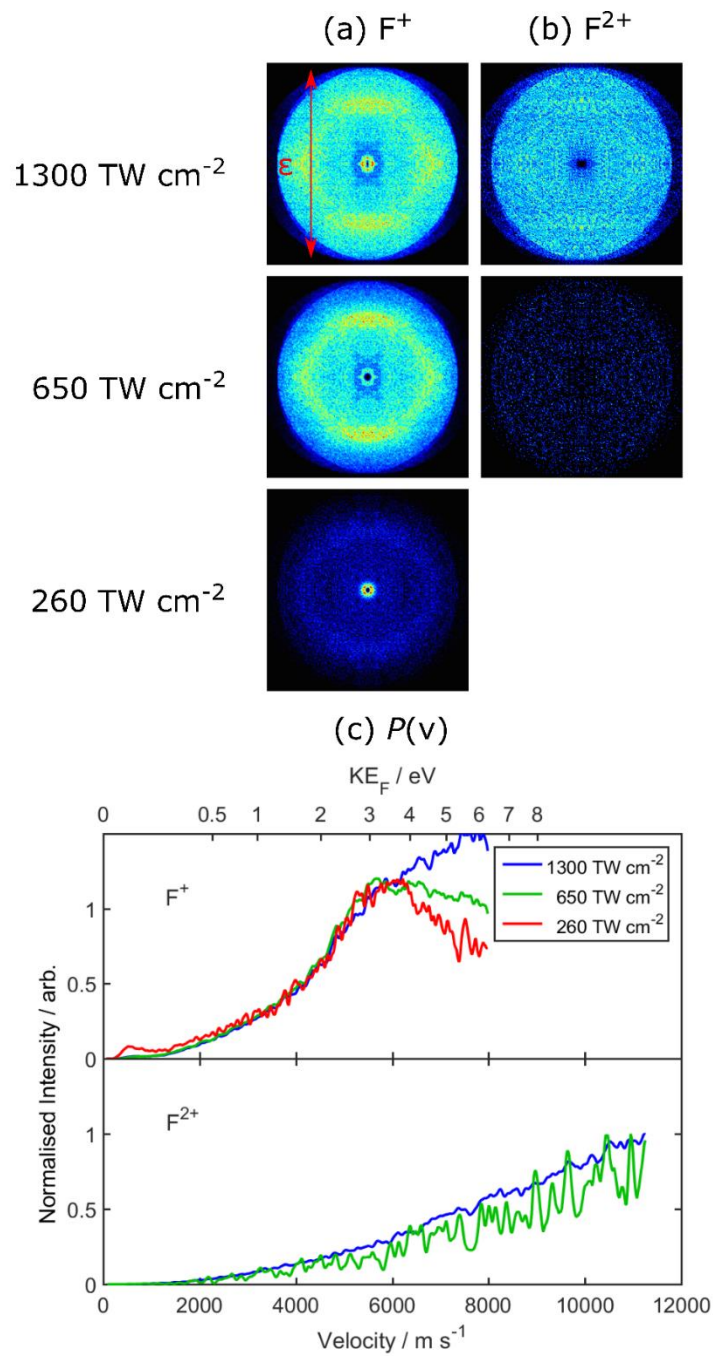

**Figure S3**

Symmetrized images of the (a)  $\text{CF}_2\text{I}^+$  and (b)  $\text{IF}^+$  fragments observed following SFI of  $\text{CF}_3\text{I}$  with  $\lambda = 805$  nm photons at  $I = 1300, 650$  and  $260 \text{ TW cm}^{-2}$ , with the orientation of the  $\epsilon$  vector of the SFI laser radiation shown by the double headed red arrow in the top left panel. The corresponding  $P(v)$  distributions are shown in (c) with, in each case, the feature of greatest interest normalised to unit intensity. The lowest-velocity part of each  $P(v)$  distribution is plotted in a fainter hue in recognition of the reduced sensitivity at the detector centre.

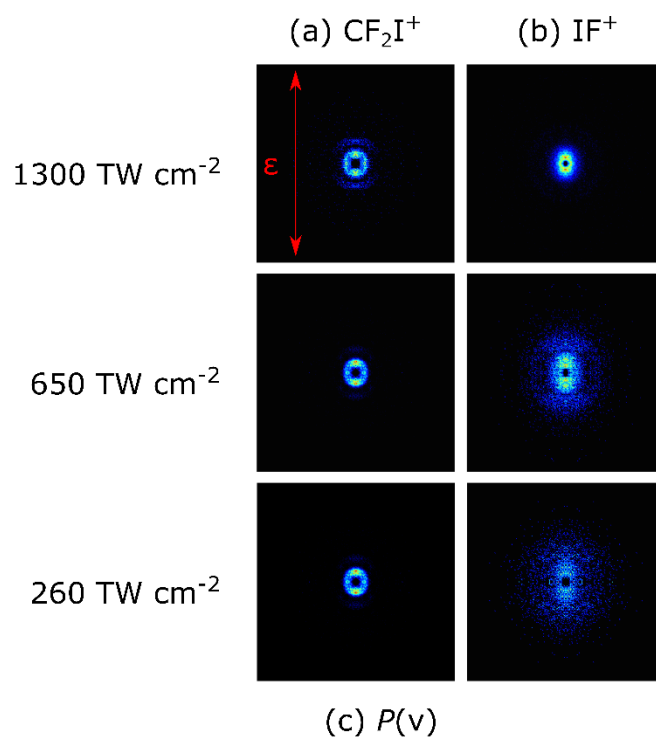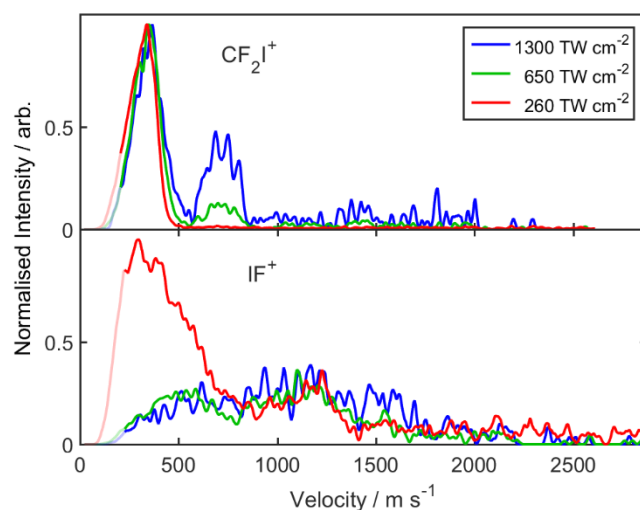

**Figure S4**

(a) Symmetrized images of the  $\text{CF}_2\text{I}^{2+}$  fragments observed following SFI of  $\text{CF}_3\text{I}$  with  $\lambda = 805$  nm photons at  $I = 1300, 650$  and  $260$   $\text{TW cm}^{-2}$ , with the orientation of the  $\epsilon$  vector of the SFI laser radiation shown by the double headed red arrow in the top left panel. The corresponding  $P(v)$  distributions are shown in (b) with, in each case, the feature at low velocity normalised to unit intensity. The small peak at  $v \sim 1050$   $\text{m s}^{-1}$  is highlighted by an arrow, and the lowest- and highest-velocity parts of the various  $P(v)$  distributions have been plotted in a fainter hue in recognition of, respectively, the reduced sensitivity at the detector centre, and the likelihood that signal from traces of bromothiophene contamination (from a preceding experiment) is responsible for the feature centred at  $v \sim 2400$   $\text{m s}^{-1}$  observed at  $I = 1300$   $\text{TW cm}^{-2}$ .

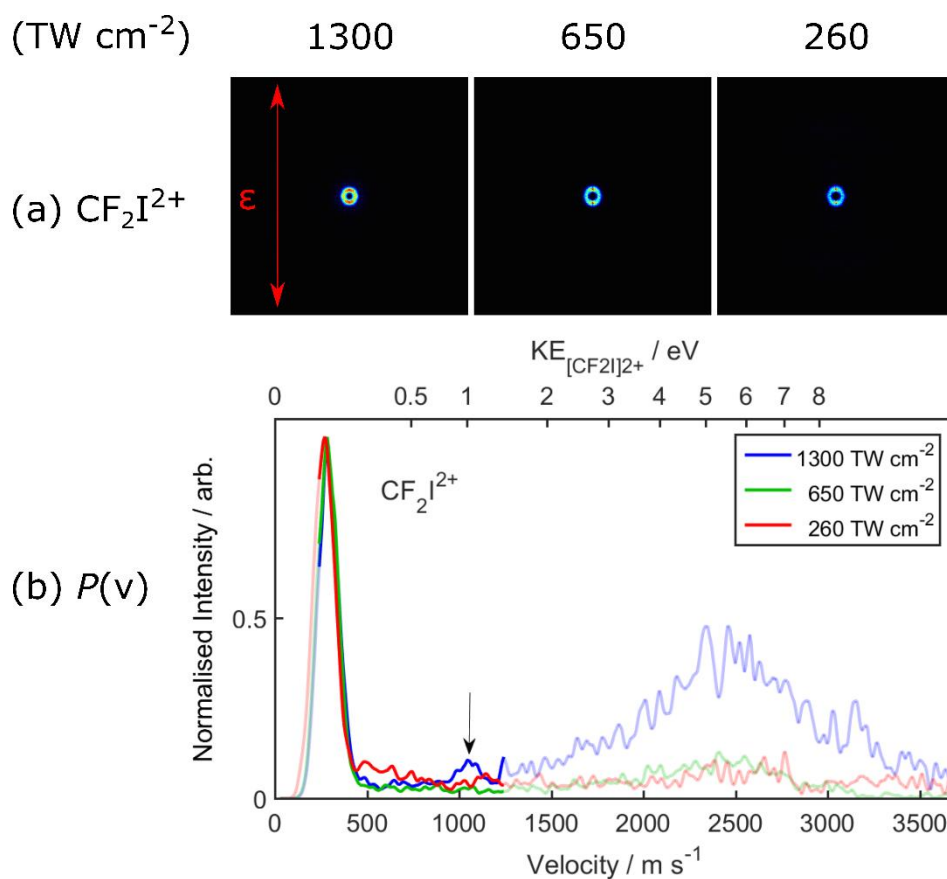



**Figure S5**

$(I^{q+}, CF_3^+)$ ,  $(I^{q+}, CF_2^+)$  and  $(I^{q+}, CF^+)$  ( $q = 1, 2$ ) covariance map images from the  $I = 260 \text{ TW cm}^{-2}$  data from SFI of  $CF_3I$  with, in each case, the recoil direction of the reference ion vertically upwards as illustrated by the red arrow in the top left-hand panel. The covariance signal of interest in each case is bounded by dashed white lines.

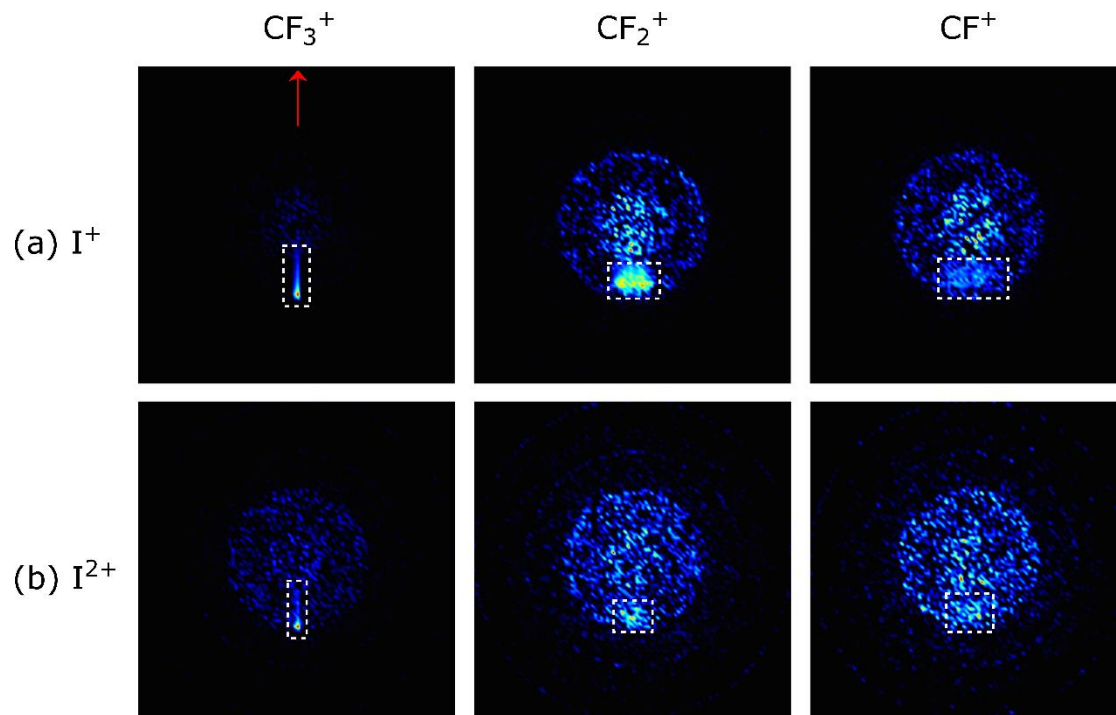

**Figure S6**

$(I^{q+}, CF_3^+ (q = 1, 2))$  and  $(CF_3^+, I^{q+})$  covariance map images from the  $I = 650$  and  $1300$   $TW\ cm^{-2}$  data from SFI of  $CF_3I$  with, in each case, the recoil direction of the reference ion vertically upwards as illustrated by the red arrow in the top left-hand panel. The covariance signal of interest, bounded by dashed white lines, is not identifiable in the  $(I^{2+}, CF_3^+)$  covariance map image from the  $I = 1300$   $TW\ cm^{-2}$  data.

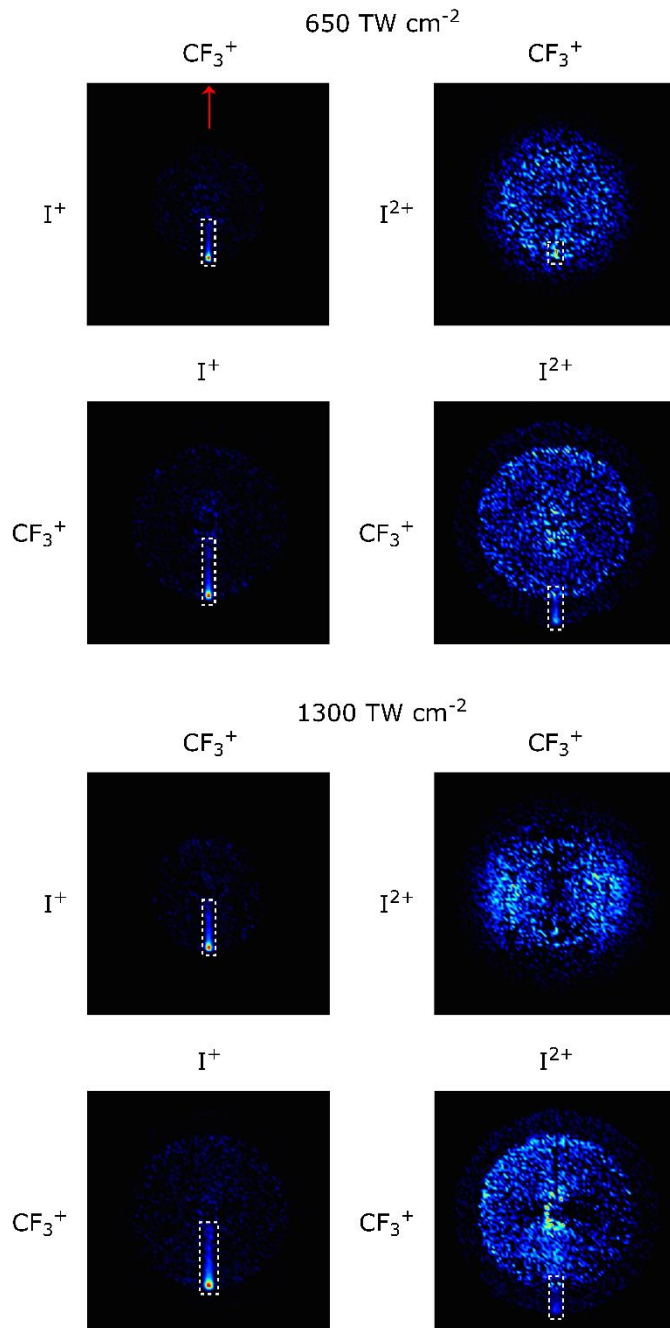

**Figure S7**

$(\text{I}^{2+}, \text{CF}_3^{2+})$  and  $(\text{CF}_3^{2+}, \text{I}^{2+})$  covariance map images from the  $I = 650 \text{ TW cm}^{-2}$  data from SFI of  $\text{CF}_3\text{I}$ . In each case, the recoil direction of the reference ion is vertically upwards, as illustrated by the red arrow in the top left-hand panel. The covariance signal of interest in the left-hand image is bounded by dashed white lines.

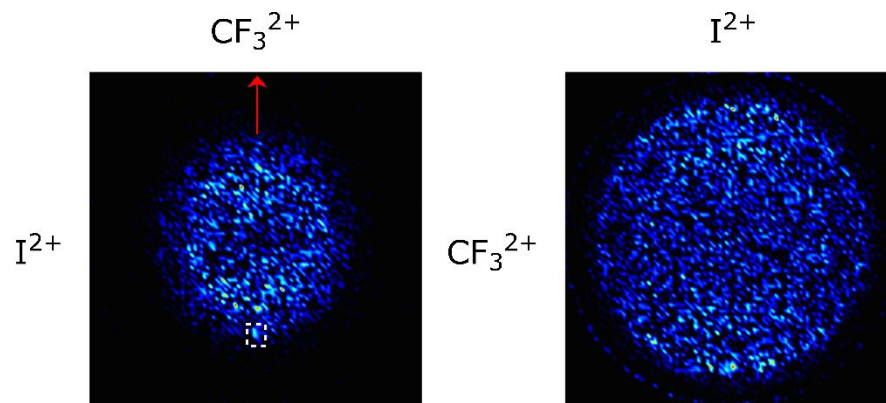

**Figure S8**

( $\text{IF}^+$ ,  $\text{CF}_2^+$ ) and ( $\text{CF}_2\text{I}^+$ ,  $\text{F}^+$ ) covariance map images from the  $I = 260 \text{ TW cm}^{-2}$  data from SFI of  $\text{CF}_3\text{I}$  with, in each case, the recoil direction of the reference ion vertically upwards as illustrated by the red arrow in the top left-hand panel. The covariance signal of interest in each case is bounded by dashed white lines.

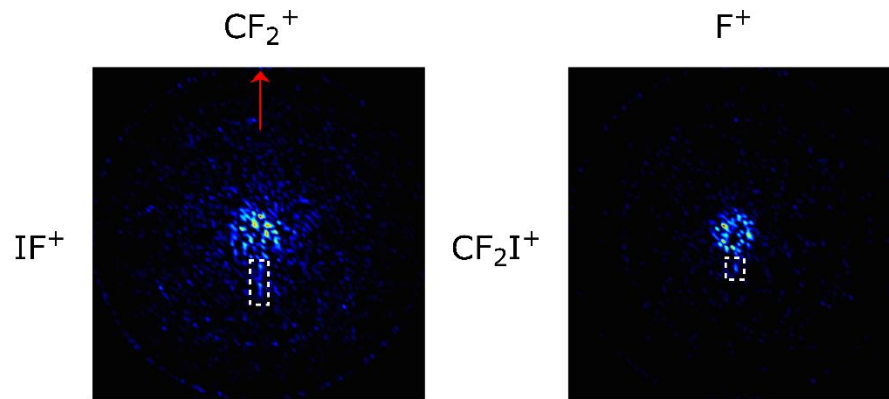

Supplement: d2cp02449g1.pdf [file d2cp02449g1.pdf]
